# Supplementary material for: Does the rate of competing isomerisation during alkene metathesis depend on pre-catalyst initiation rate?
Source: Royal Society of Chemistry journal article supplement (doi:10.1039/c4dt00007b), 2014-01-01
Supplement: c4dt00007b.pdf [file c4dt00007b.pdf]

SUPPORTING INFORMATION FOR

***Does the rate of competing isomerisation during  
alkene metathesis depend on pre-catalyst initiation rate?***

David J. Nelson\* and Jonathan M. Percy\*

WestCHEM Department of Pure & Applied Chemistry, University of Strathclyde, 295 Cathedral Street, Glasgow, G1  
1XL, UK

**Contents**

|                                               |                                    |                                |                   |            |
|-----------------------------------------------|------------------------------------|--------------------------------|-------------------|------------|
| General Experimental                          |                                    |                                |                   | <b>S2</b>  |
| Kinetic Data Plots                            |                                    |                                |                   |            |
| 1,8-nonadiene                                 | 3 mol% <b>G1</b>                   | benzene- <i>d</i> <sub>6</sub> | <b>(Figure 1)</b> | <b>S3</b>  |
| 1,8-nonadiene                                 | 3 mol% <b>G2</b>                   | benzene- <i>d</i> <sub>6</sub> | <b>(Figure 2)</b> | <b>S4</b>  |
| 1,8-nonadiene                                 | 3 mol% <b>GH2</b>                  | benzene- <i>d</i> <sub>6</sub> | <b>(Figure 3)</b> | <b>S5</b>  |
| 1,8-nonadiene                                 | 3 mol% <b>Zhan1B</b>               | benzene- <i>d</i> <sub>6</sub> | <b>(Figure 3)</b> | <b>S6</b>  |
| 1,8-nonadiene                                 | 3 mol% <b>Grela2</b>               | benzene- <i>d</i> <sub>6</sub> | <b>(Figure 3)</b> | <b>S7</b>  |
| 1,8-nonadiene                                 | 3 mol% <b>M<sub>853</sub>-SIPr</b> | benzene- <i>d</i> <sub>6</sub> | <b>(Figure 4)</b> | <b>S8</b>  |
| 1,8-nonadiene                                 | 3 mol% <b>G2</b>                   | chloroform- <i>d</i>           | <b>(Figure 5)</b> | <b>S9</b>  |
| 1,8-nonadiene                                 | 3 mol% <b>G2</b>                   | undried chloroform- <i>d</i>   |                   | <b>S10</b> |
| 1,8-nonadiene                                 | 3 mol% <b>G2</b>                   | DCM- <i>d</i> <sub>2</sub>     | <b>(Figure 5)</b> | <b>S11</b> |
| 1,8-nonadiene                                 | 3 mol% <b>G2</b>                   | toluene- <i>d</i> <sub>8</sub> | <b>(Figure 5)</b> | <b>S12</b> |
| Cycloheptene                                  | 3 mol% <b>G2</b>                   | benzene- <i>d</i> <sub>6</sub> | <b>(Figure 6)</b> | <b>S13</b> |
| Cycloheptene/1,7-octadiene                    | 3 mol% <b>G2</b>                   | benzene- <i>d</i> <sub>6</sub> |                   | <b>S14</b> |
| Initiation rate measurement for <b>Zhan1B</b> |                                    |                                |                   | <b>S15</b> |
| References                                    |                                    |                                |                   | <b>S15</b> |

## General Experimental

Kinetic data were acquired using a Bruker Avance II spectrometer (600 MHz  $^1\text{H}$  observe frequency), equipped with TBI-z probe (inverse  $^1\text{H}/^{13}\text{C}/\text{BB}$ ) and temperature control. All kinetic experiments were acquired at 298 K, with an interpulse delay of 35 s to ensure accurate quantification; relaxation times for signals corresponding to many components in the reaction mixtures are known to be up to *ca.* 7 s.<sup>1</sup> Data were processed using Bruker Topspin (version 2.1 or 3.0) and Microsoft Excel (2007 or 2010).

Complexes **G1**, **G2** and **GH2** were purchased from Sigma Aldrich and used as supplied. **Zhan1B** and **Grela2** were purchased from Strem. **M8<sub>53</sub>-SIPr** was supplied by Omega Cat System (Rennes, France). Benzene-*d*<sub>6</sub>, chloroform-*d* and toluene-*d*<sub>8</sub> were purchased from Sigma Aldrich, and dichloromethane-*d*<sub>2</sub> was purchased from Goss Scientific. Deuterated solvents were dried on activated 4 Å molecular sieves overnight and degassed with a stream of nitrogen or argon, unless otherwise stated. 1,8-Nonadiene was purchased from Sigma Aldrich and passed through a pad of activated alumina before use.

## Kinetic Data Plots

1,8-nonadiene                      3 mol% G1                      benzene-*d*<sub>6</sub>                      (Figure 1)

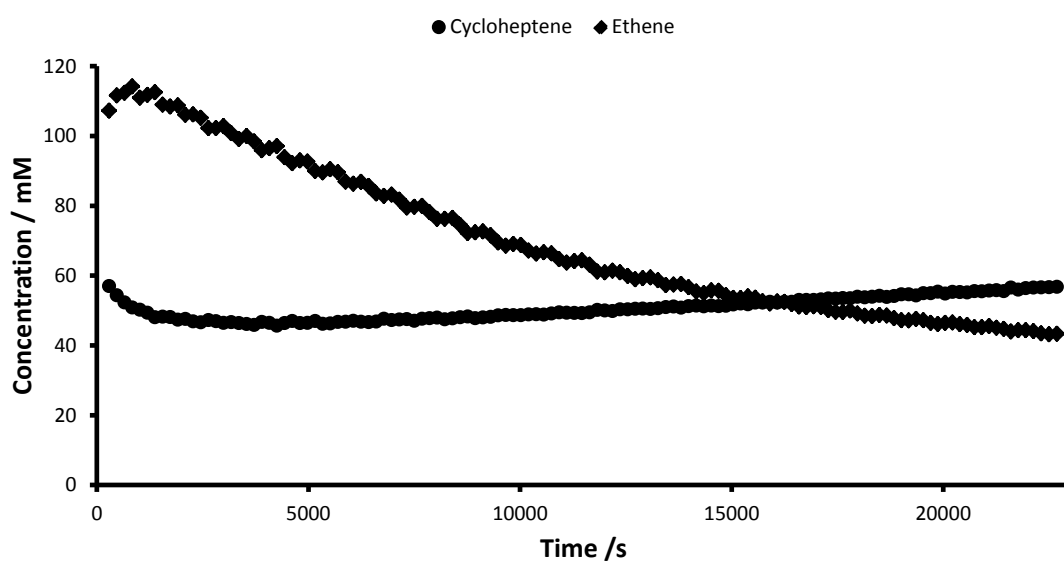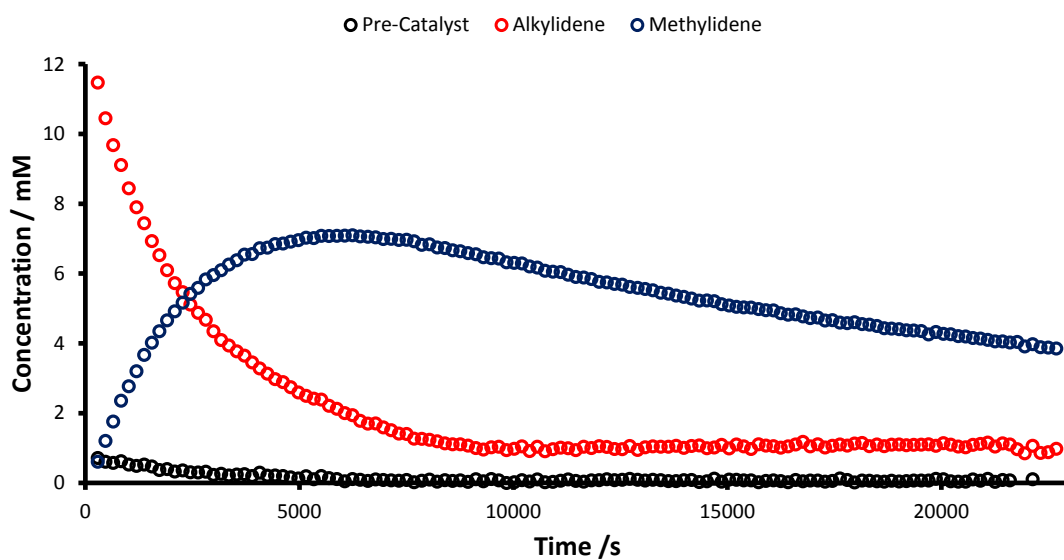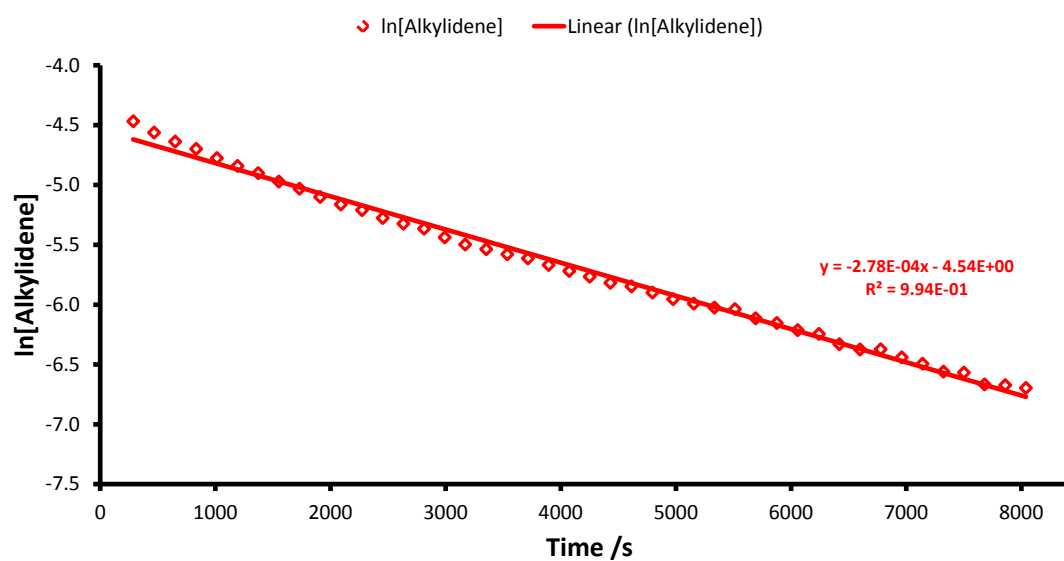

1,8-nonadiene

3 mol% G2

benzene-*d*<sub>6</sub>

(Figure 2)

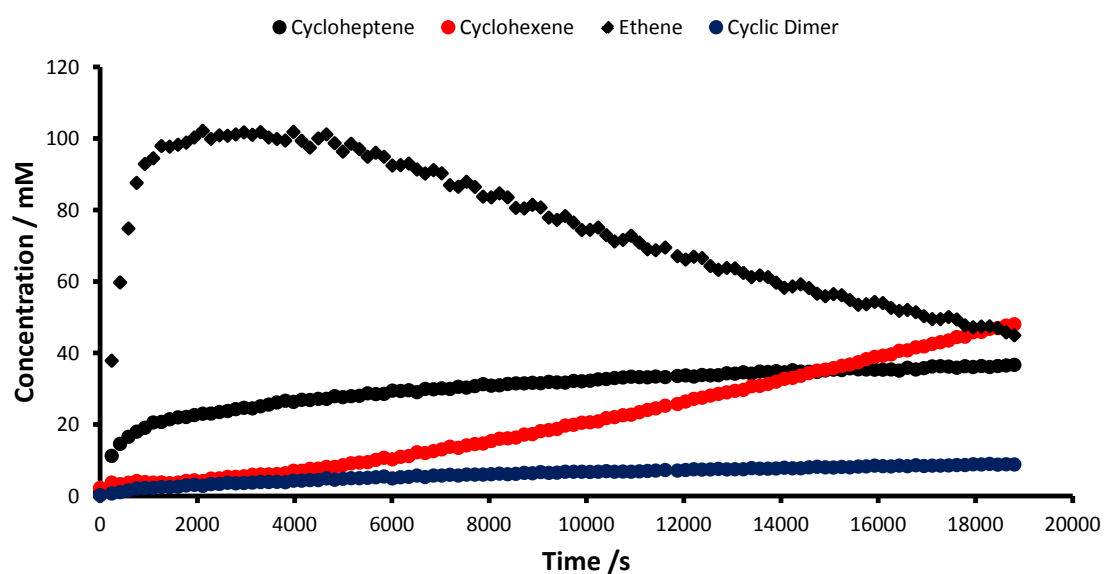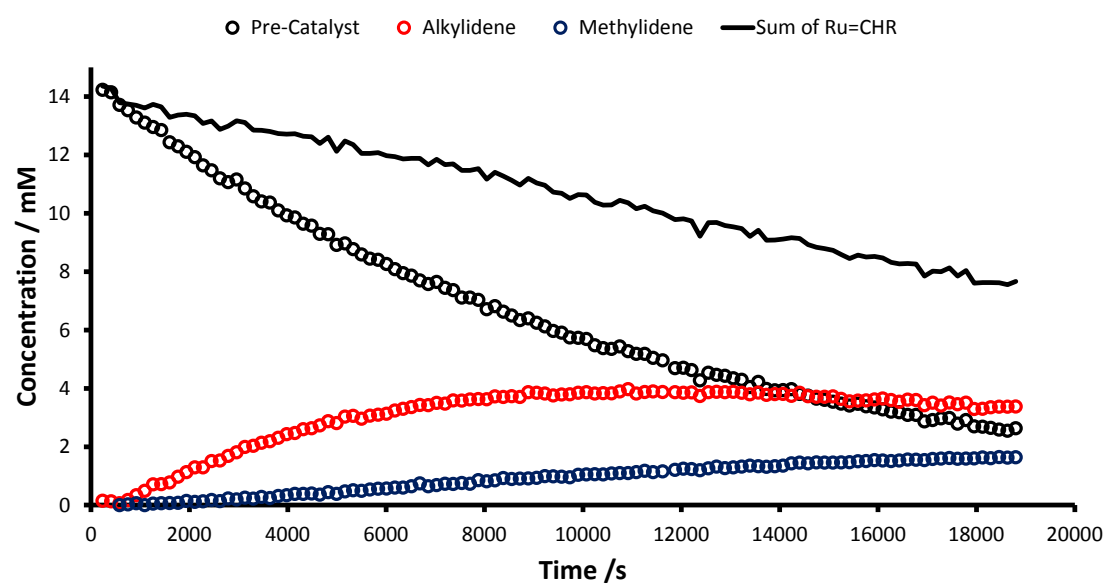

1,8-nonadiene

3 mol% GH2

benzene-*d*<sub>6</sub>

(Figure 3)

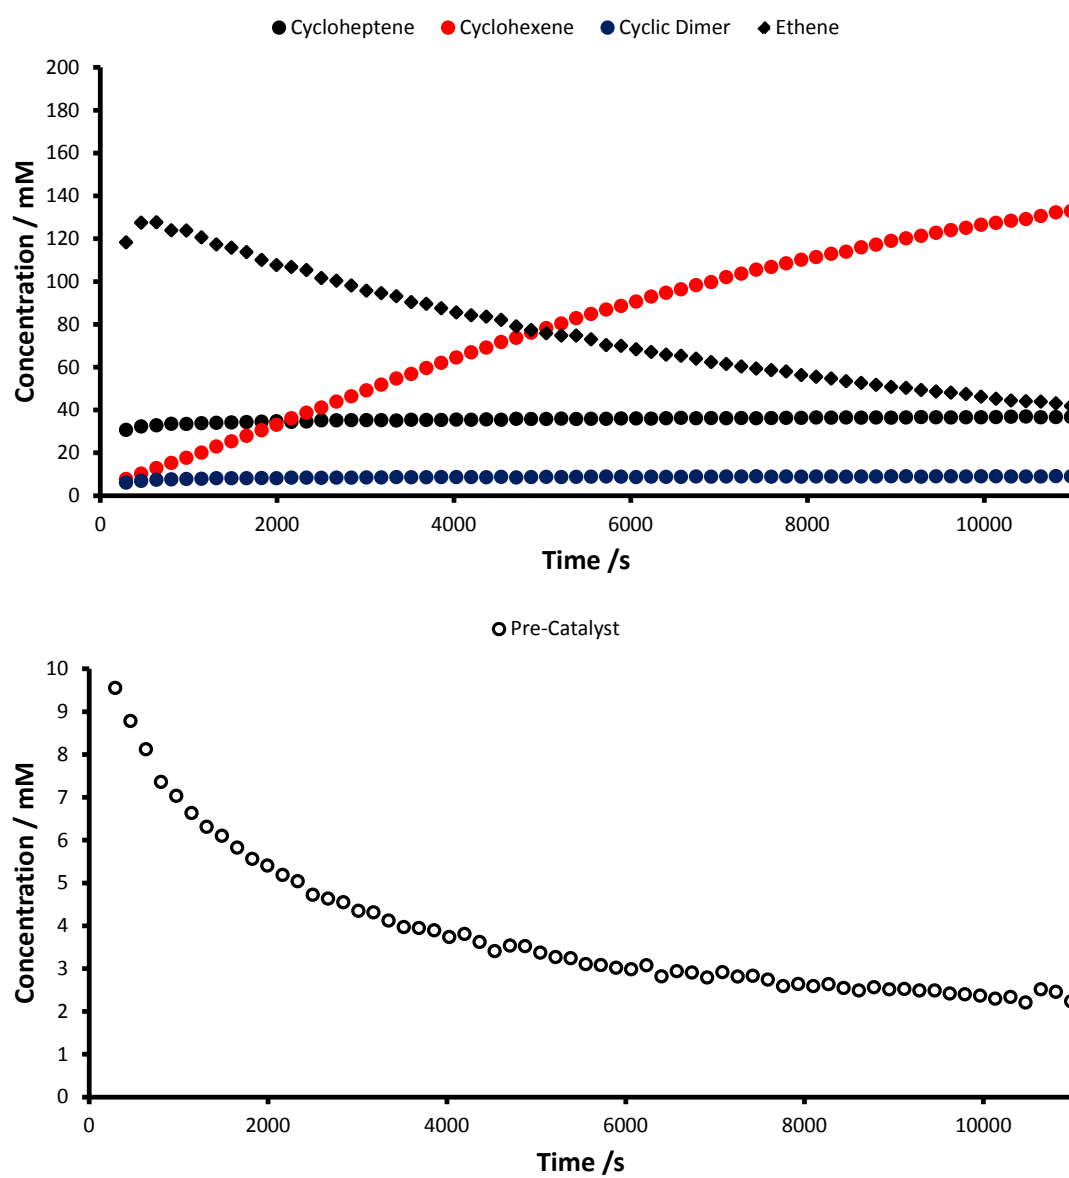

1,8-nonadiene

3 mol% **Zhan1B**

benzene-*d*<sub>6</sub>

(Figure 3)

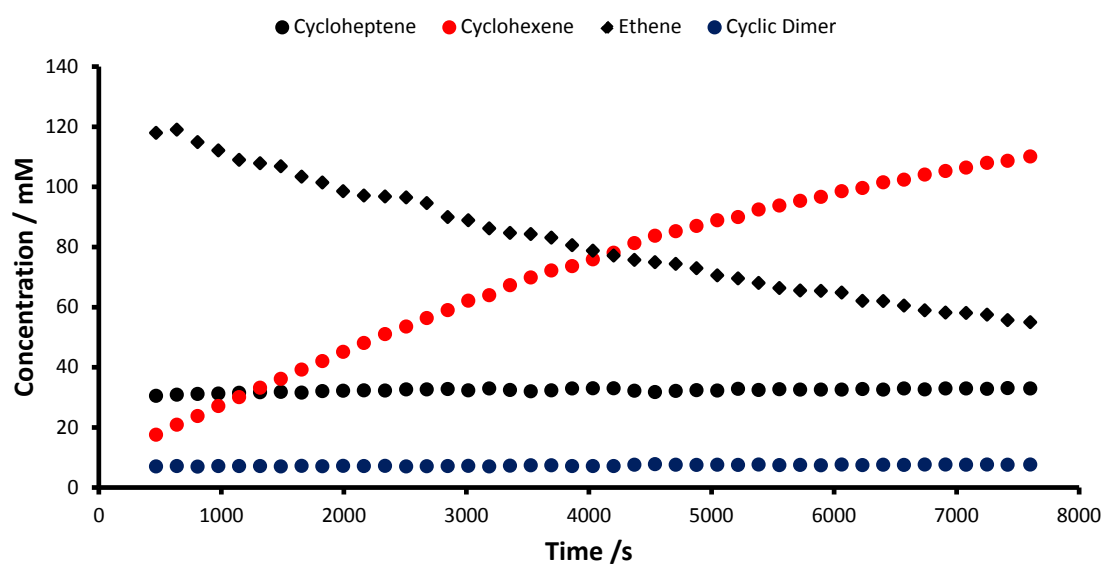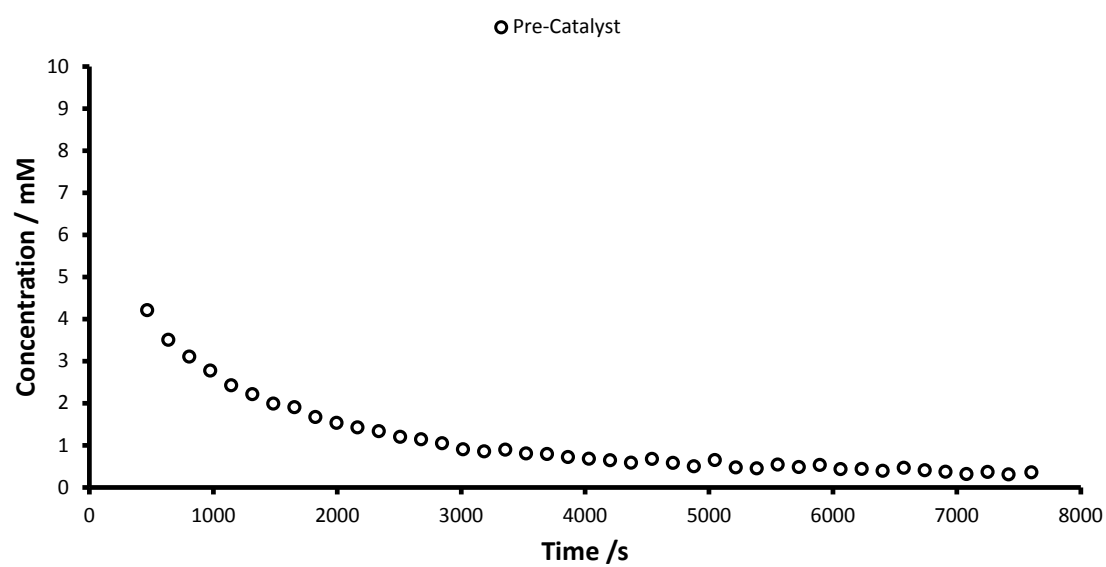

1,8-nonadiene

3 mol% **Grela2**

benzene-*d*<sub>6</sub>

(Figure 3)

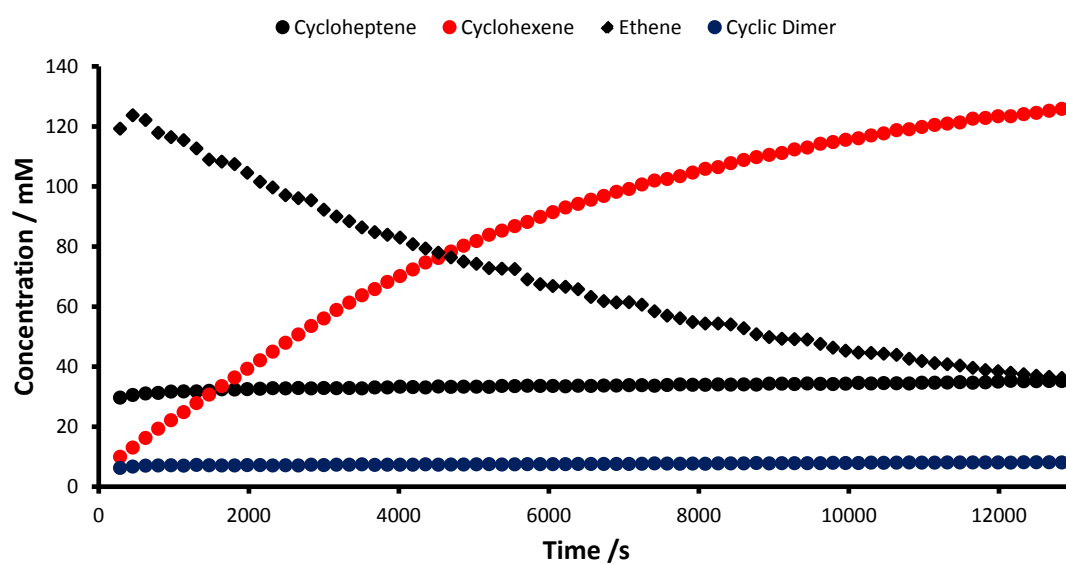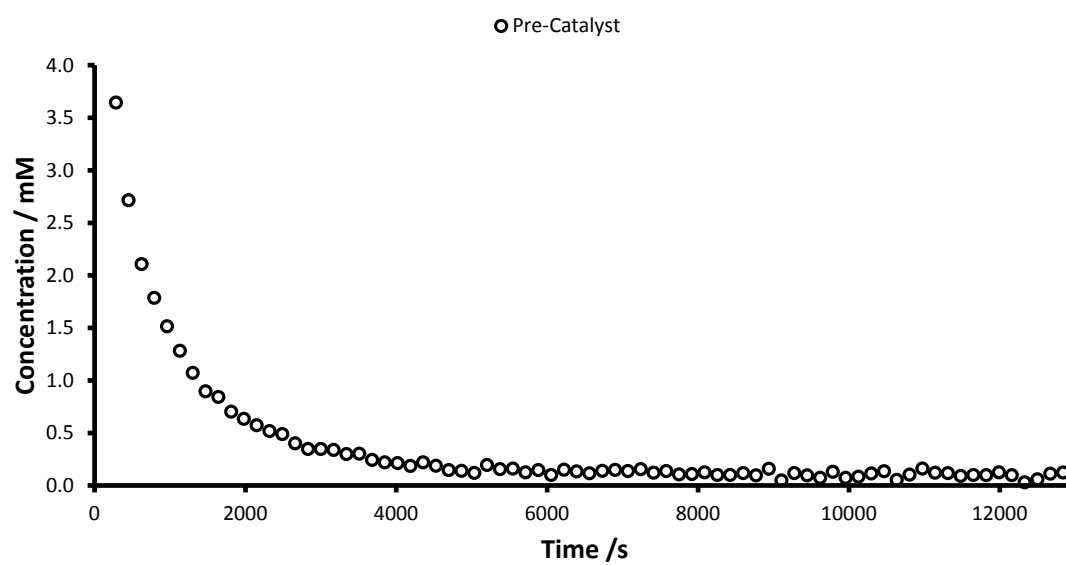

1,8-nonadiene 3 mol%  $M_{853}$ -SIPr benzene- $d_6$  (Figure 4)

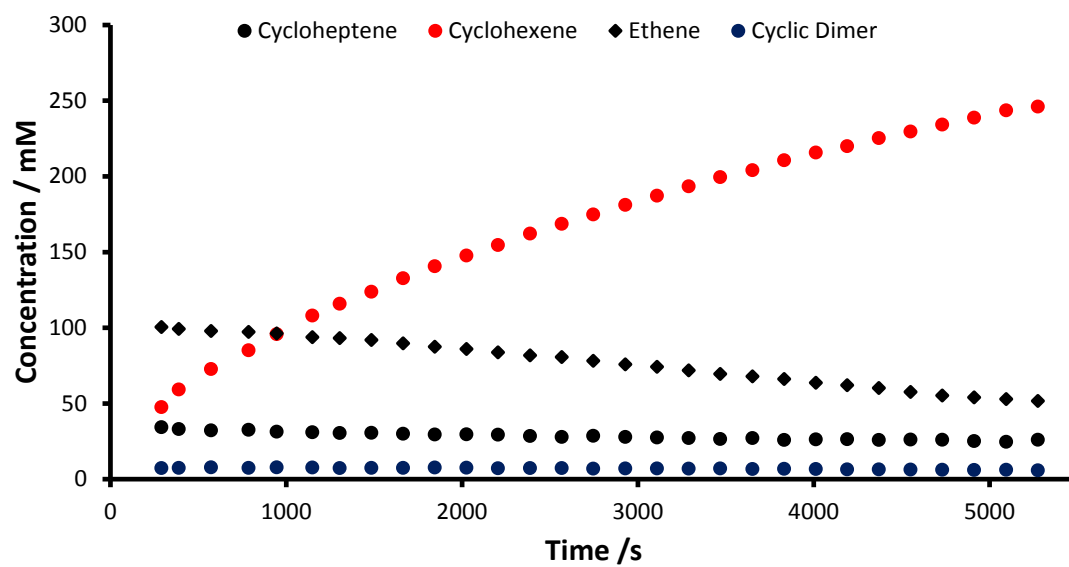



1,8-nonadiene

3 mol% G2

chloroform-*d* (Figure 5)

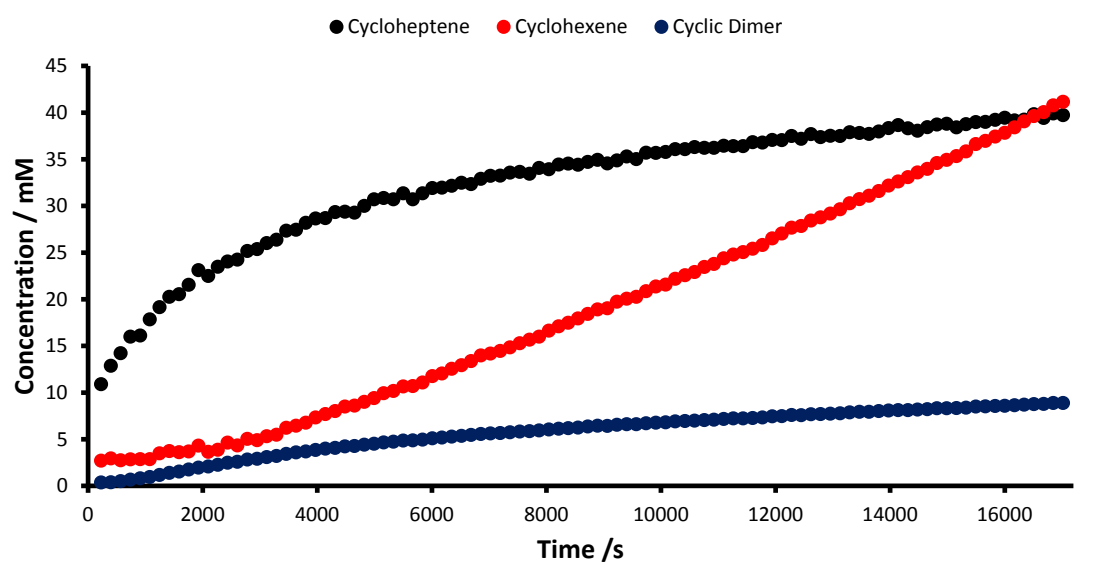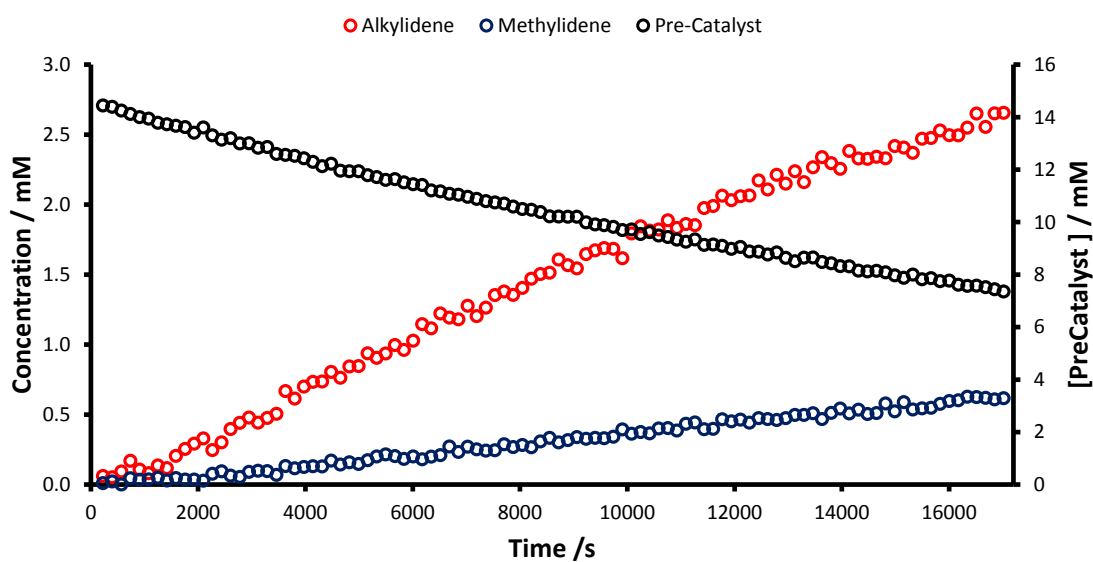

1,8-nonadiene

3 mol% G2

undried chloroform-*d*

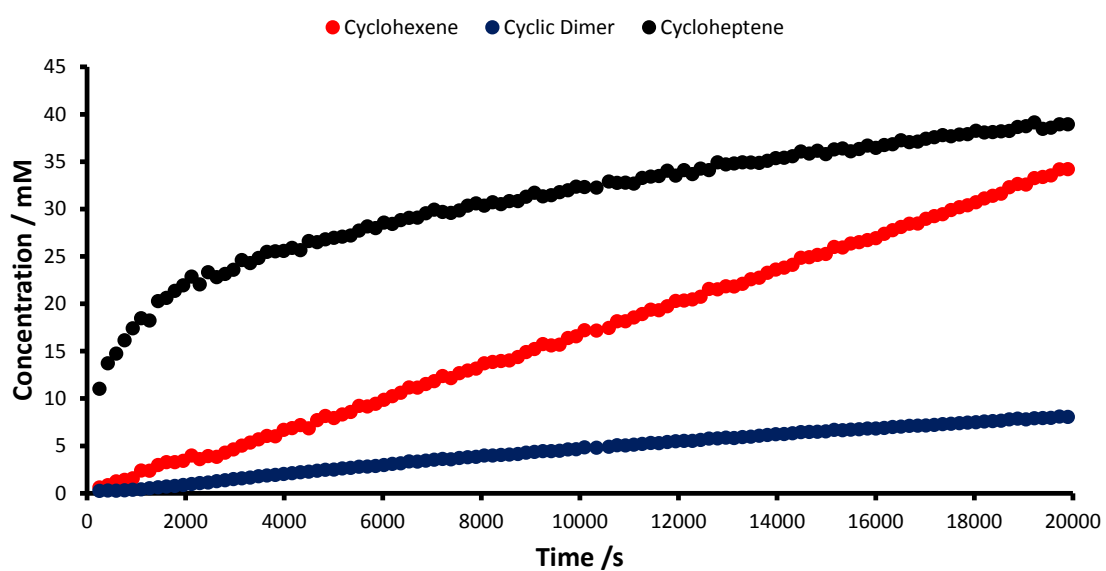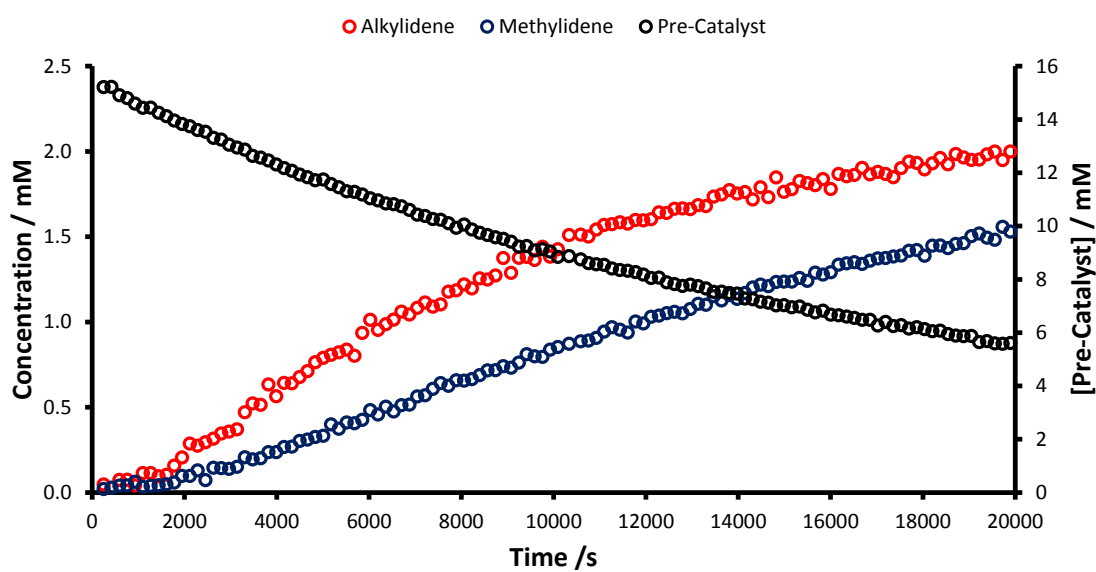

1,8-nonadiene

3 mol% G2

DCM- $d_2$

(Figure 5)

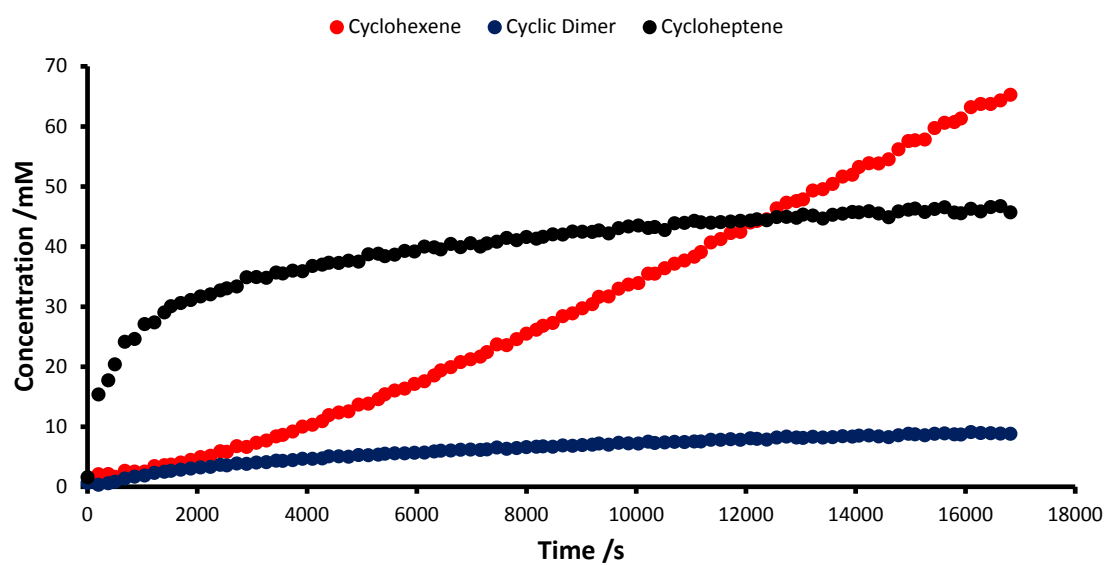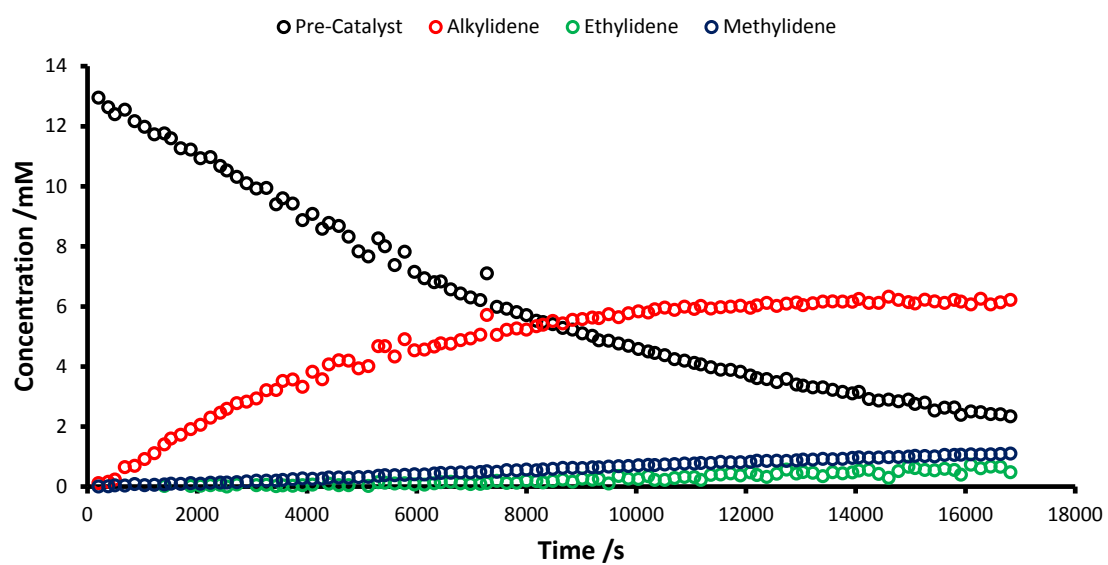

1,8-nonadiene 3 mol% G2 toluene- $d_8$  (Figure 5)

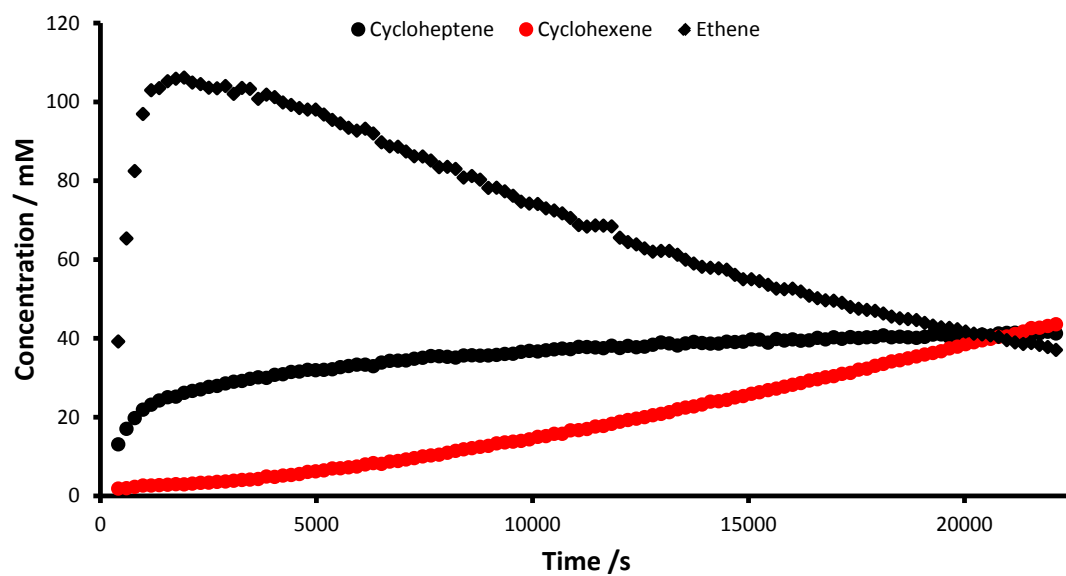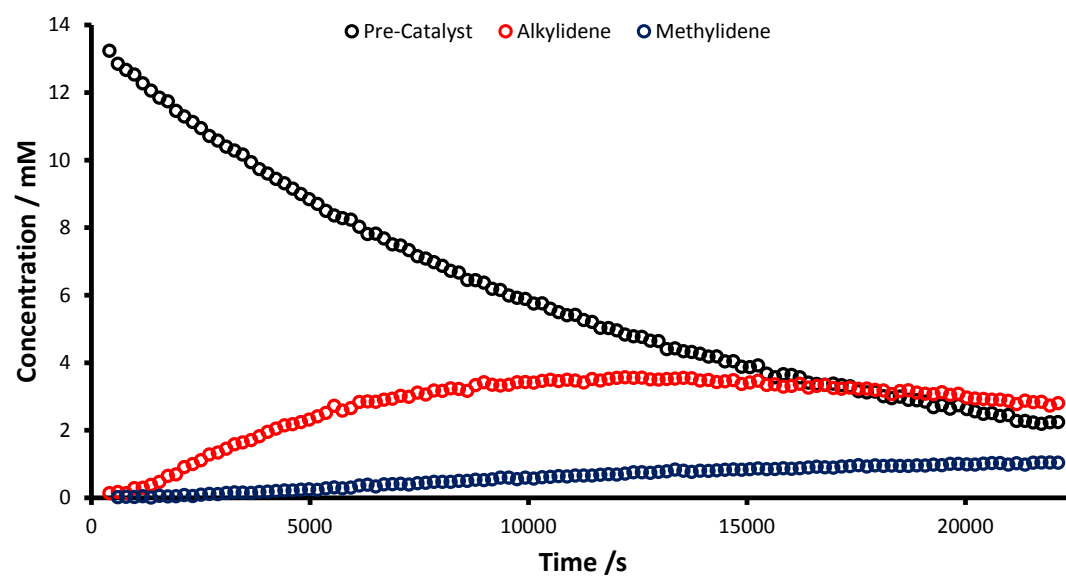

Cycloheptene                      3 mol% G2                      benzene-*d*<sub>6</sub>                      (Figure 6)

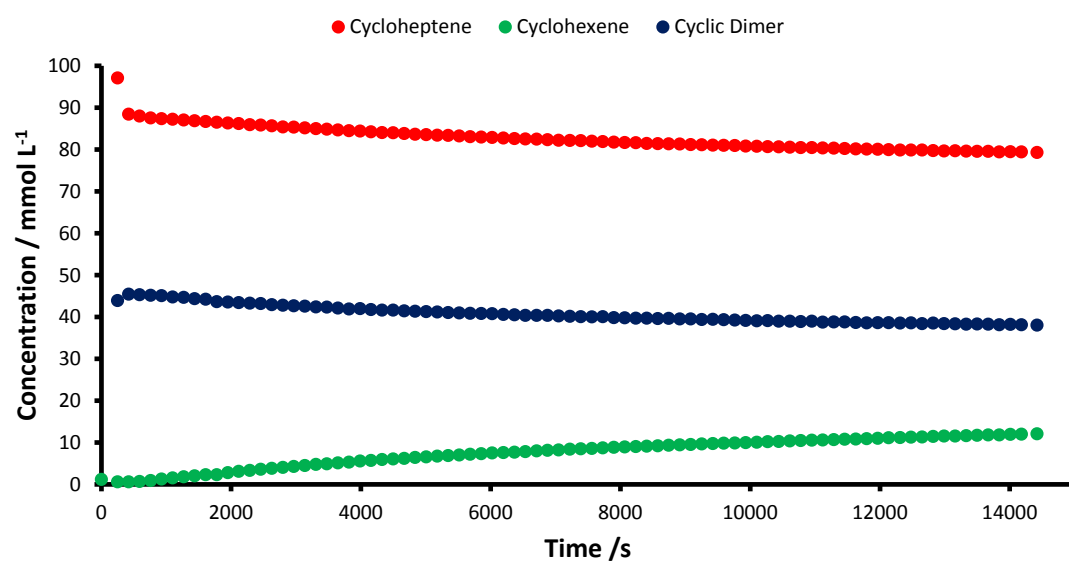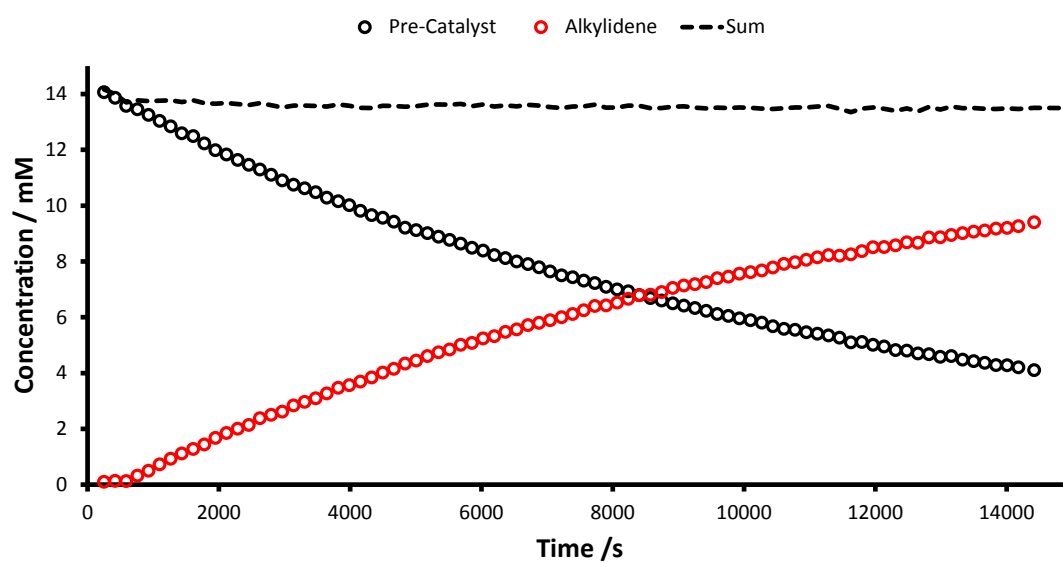

Cycloheptene/1,7-octadiene 3 mol% G2 benzene- $d_6$

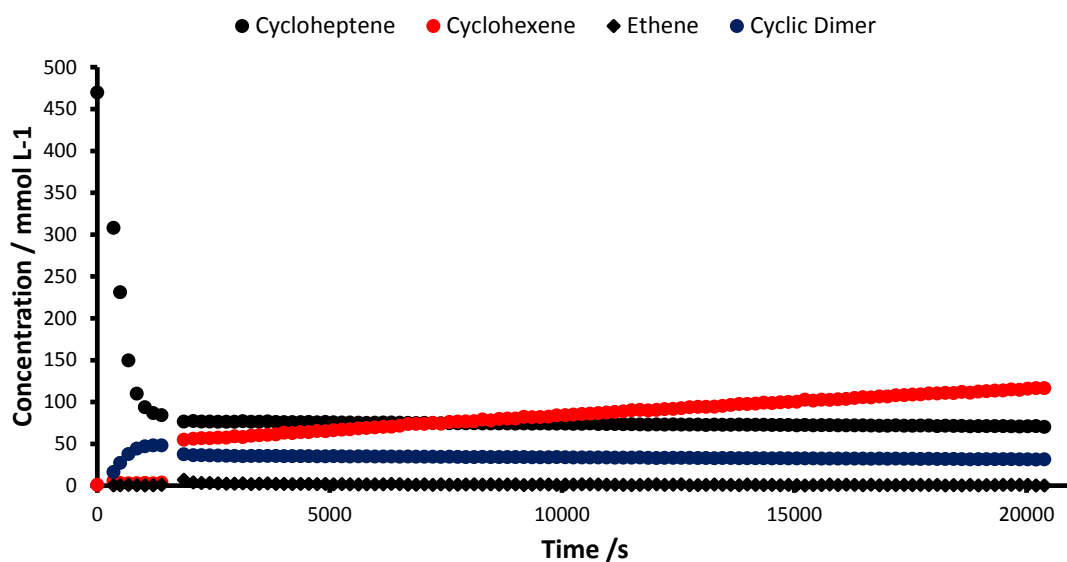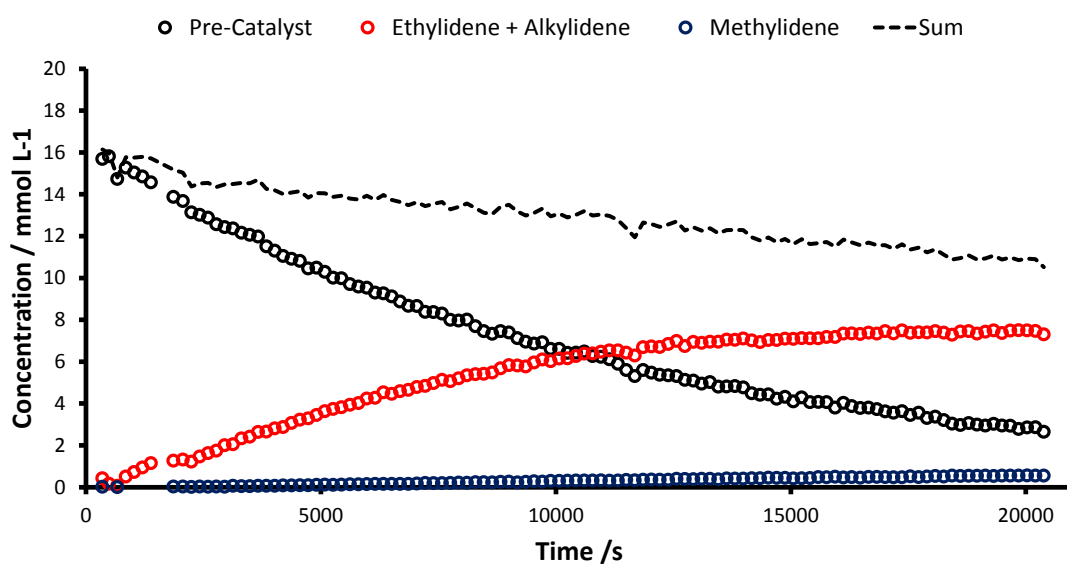

## Initiation Rate Measurement for Zhan1B

The initiation rate for this complex was determined by monitoring the reaction of the pre-catalyst with ethyl vinyl ether in DCM solution at 298 K using UV/visible spectroscopy, using the same apparatus and method used for the determination of the initiation rate constants for complexes **GH2**<sup>2</sup> and **Grela2**.<sup>3</sup>

| [ethyl vinyl ether] / mol L <sup>-1</sup> | $k_{\text{obs}}$ / s <sup>-1</sup> |
|-------------------------------------------|------------------------------------|
| 0.02676                                   | 0.00336                            |
| 0.02662                                   | 0.00379                            |
| 0.05055                                   | 0.00695                            |
| 0.05029                                   | 0.00705                            |
| 0.10320                                   | 0.01409                            |
| 0.10267                                   | 0.01405                            |
| 0.20205                                   | 0.02626                            |
| 0.20101                                   | 0.02624                            |

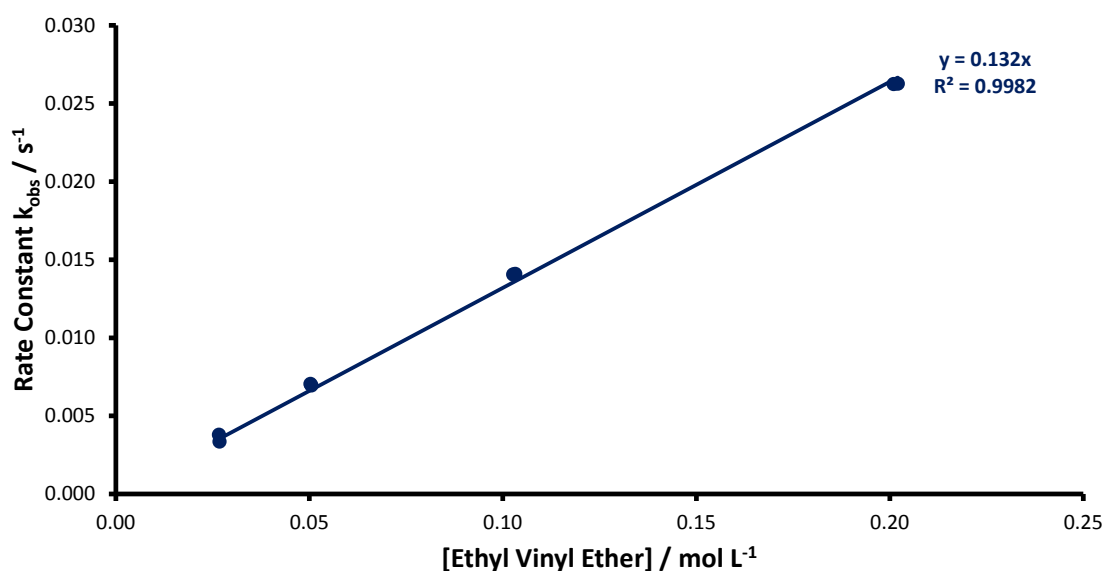

## References

1. I. W. Ashworth, D. Carboni, I. H. Hillier, D. J. Nelson, J. M. Percy, G. Rinaudo and M. A. Vincent, *Chem. Commun.*, 2010, **46**, 7145-7147.
2. I. W. Ashworth, I. H. Hillier, D. J. Nelson, J. M. Percy and M. A. Vincent, *Chem. Commun.*, 2011, **47**, 5428-5430.
3. D. J. Nelson, P. Queval, M. Rouen, M. Magrez, L. Toupet, F. Caijo, E. Borré, I. Laurent, C. Crévisy, O. Baslé, M. Mauduit and J. M. Percy, *ACS Catal.*, 2013, **3**, 259-264.
